# Supplementary material for: A facile solvent mediated self-assembly silver nanoparticle mirror substrate for quantitatively improved surface enhanced Raman scattering
Source: Royal Society of Chemistry journal article supplement (doi:10.1039/c7an00784a), 2017-01-01
Supplement: c7an00784a1.pdf [file c7an00784a1.pdf]

## Supporting information

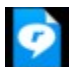

mirror formation.QT

**Video 1.** Illustration of AgNP mirror formation.

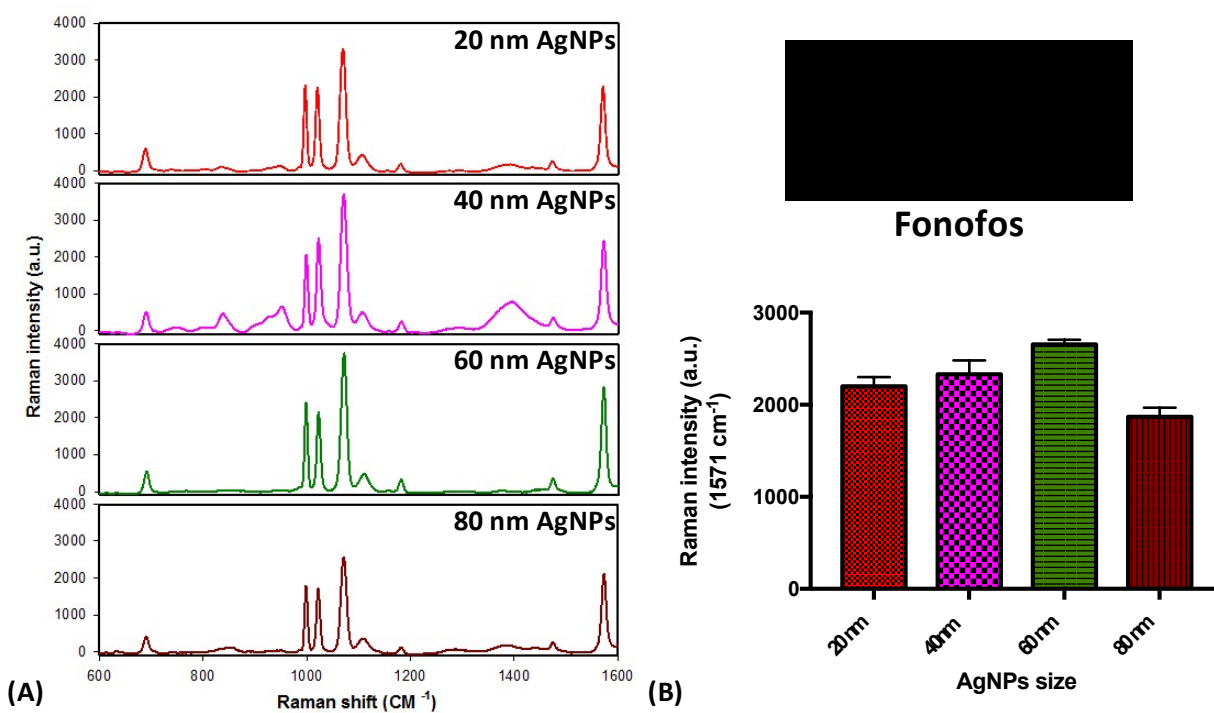

**Figure 1.** (A) SERS spectra of fonofos at a concentration of 5 ppm on the mirror surfaces were prepared using different sizes of silver nanoparticles. (B) Plots of Raman intensity at 1571 cm<sup>-1</sup> of fonofos as a function of silver nanoparticle sizes.

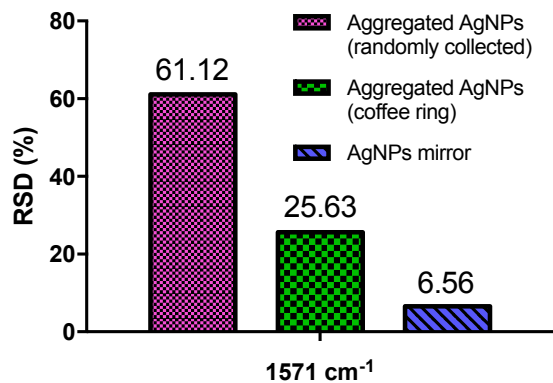

**Figure 2.** Relative standard deviations of Raman readings at 1571 cm<sup>-1</sup> band from randomly collected aggregated AgNPs, coffee ring aggregated AgNPs, and AgNPs mirror.

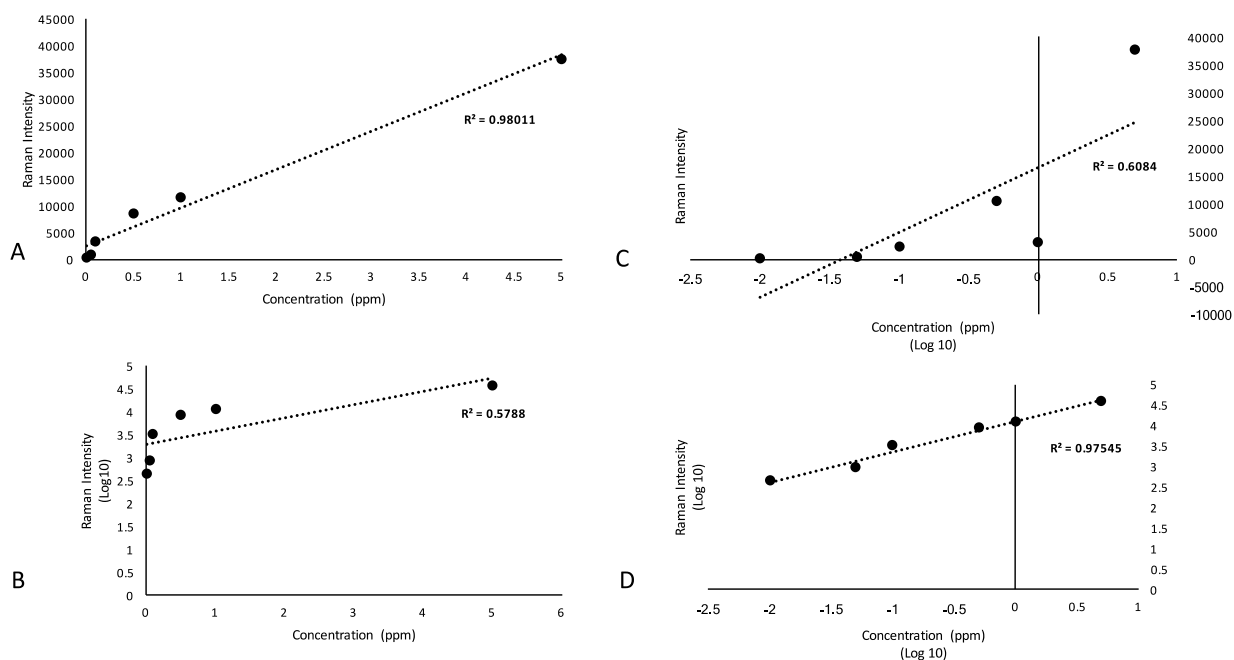

**Figure 3.** Calibration curve of Raman intensity at 1571 cm<sup>-1</sup> plotted as a function of fonofos concentration. A. No logarithmic applied. B. Logarithmic applied to X-axis. C. Logarithmic applied to Y-axis. D. Logarithmic applied to X-axis and Y-axis.

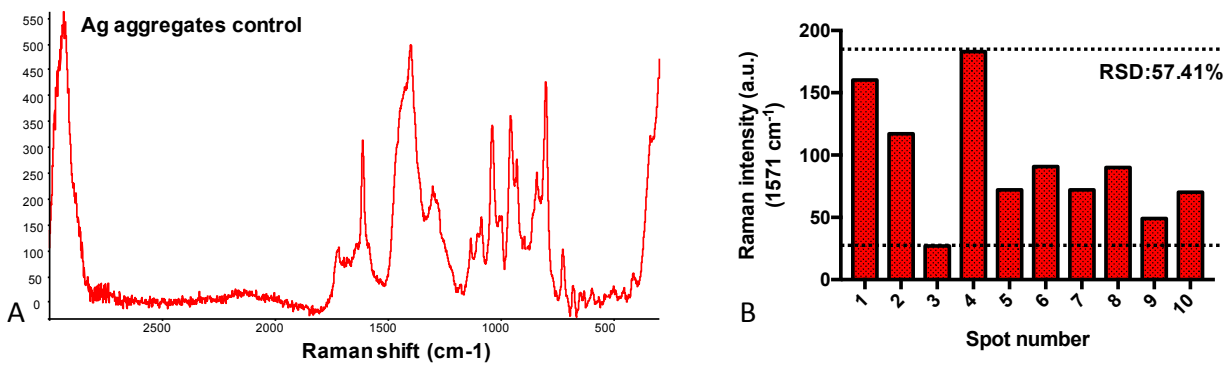

**Figure 4.** A. Raman spectra of silver aggregates background. B. Raman readings of 10 spots randomly collected from the coffee ring, relative standard deviation is shown.

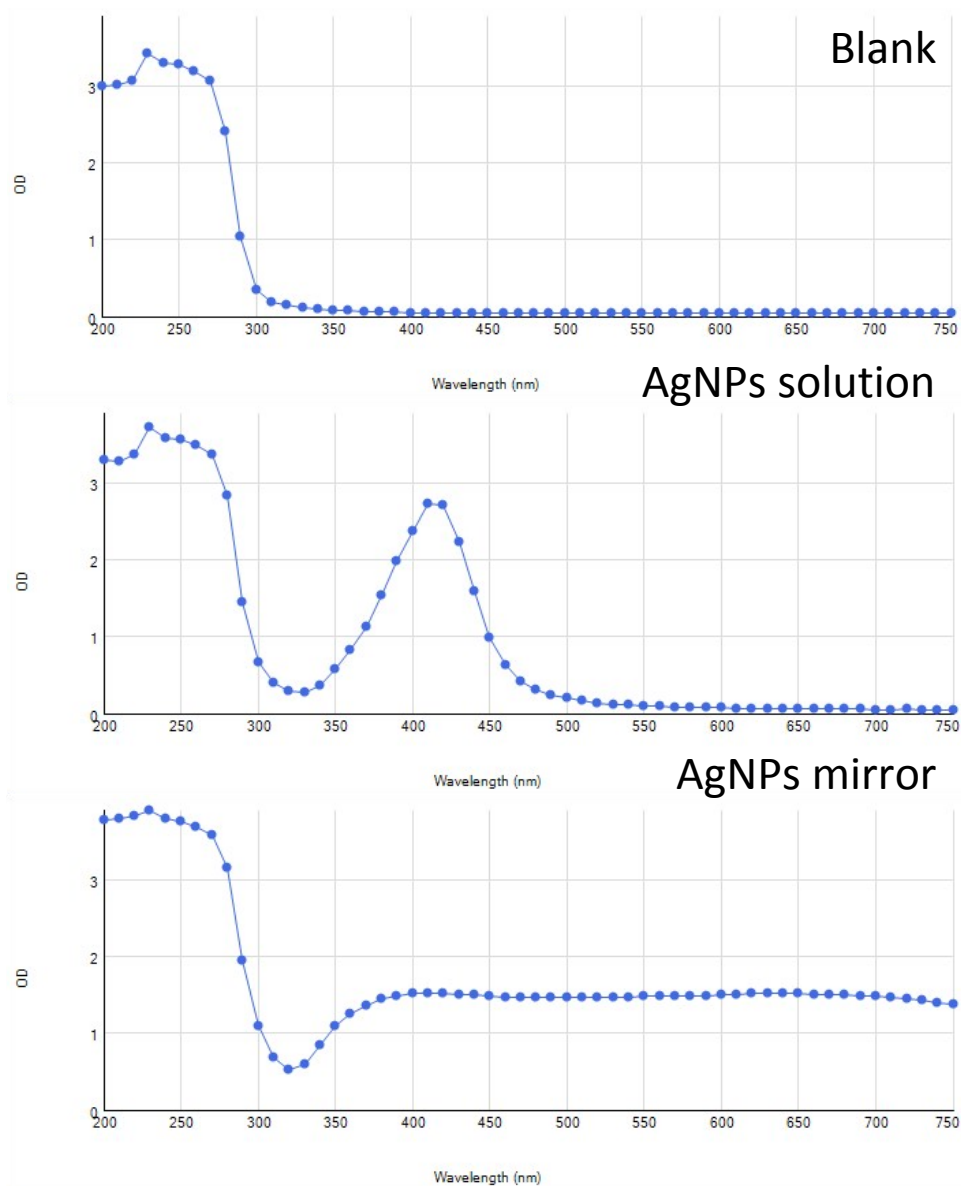

**Figure 5.** Absorbance spectra of blank, AgNPs solution and AgNPs mirror.
